# Supplementary material
Source: HighWire-hosted journal article supplement (https://bmjopen.bmj.com/content/10/3/e034189)
Supplement: inline-supplementary-material-1 [file inline-supplementary-material-1.pdf]

## Classification of responses in Barthel index as ‘dependent’ and ‘independent’

| <b>Item</b>                              | <b>Response options</b>                                               | <b>Dependent/Independent</b> |
|------------------------------------------|-----------------------------------------------------------------------|------------------------------|
| <b>FEEDING</b>                           | unable                                                                | Dependent                    |
|                                          | needs help cutting, spreading butter, etc., or requires modified diet | Dependent                    |
|                                          | independent                                                           | Independent                  |
| <b>BATHING</b>                           | dependent                                                             | Dependent                    |
|                                          | independent (or in shower)                                            | Independent                  |
| <b>GROOMING</b>                          | needs to help with personal care                                      | Dependent                    |
|                                          | independent face/hair/teeth/shaving (implements provided)             | Independent                  |
| <b>DRESSING</b>                          | dependent                                                             | Dependent                    |
|                                          | needs help but can do about half unaided                              | Dependent                    |
|                                          | independent (including buttons, zips, laces, etc.)                    | Independent                  |
| <b>BOWELS</b>                            | incontinent (or needs to be given enemas)                             | Dependent                    |
|                                          | occasional accident                                                   | Independent                  |
|                                          | continent                                                             | Independent                  |
| <b>BLADDER</b>                           | incontinent, or catheterized and unable to manage alone               | Dependent                    |
|                                          | occasional accident                                                   | Independent                  |
|                                          | continent                                                             | Independent                  |
| <b>TOILET USE</b>                        | dependent                                                             | Dependent                    |
|                                          | needs some help, but can do something alone                           | Dependent                    |
|                                          | independent (on and off, dressing, wiping)                            | Independent                  |
| <b>TRANSFERS (BED TO CHAIR AND BACK)</b> | unable, no sitting balance                                            | Dependent                    |
|                                          | major help (one or two people, physical), can sit                     | Dependent                    |
|                                          | minor help (verbal or physical)                                       | Dependent                    |
|                                          | independent                                                           | Independent                  |
| <b>MOBILITY (ON LEVEL SURFACES)</b>      | immobile or < 50 yards                                                | Dependent                    |
|                                          | wheelchair independent, including corners, > 50 yards                 | Dependent                    |
|                                          | walks with help of one person (verbal or physical) > 50 yards         | Dependent                    |
|                                          | independent (but may use any aid; for example, stick) > 50 yards      | Independent                  |
| <b>STAIRS</b>                            | unable                                                                | Dependent                    |
|                                          | needs help (verbal, physical, carrying aid)                           | Independent                  |
|                                          | independent                                                           | Independent                  |
